# Supplementary material for: A Diet Based on Cured Acorn Ham with Oleic Acid Content Promotes Anti-Inflammatory Gut Microbiota Shifts and Prevents Ulcerative Colitis in an Animal Model
Source: Preprints.org preprint supplement (doi:10.20944/preprints201903.0005.v1), 2019-03-01
Supplement: Supplementary file 1 [file supplementary]

1       **A diet based on cured acorn ham with oleic acid content promotes anti-inflammatory gut**  
2       **microbiota shifts and prevents ulcerative colitis in an animal model**

3  
4   Supplementary Material

5  
6   **J. Fernández,<sup>1</sup> V. García de la Fuente,<sup>4</sup> M. T. Fernández García,<sup>4</sup> J. Gómez Sánchez,<sup>3</sup> B. Isabel**  
7   **Redondo,<sup>2</sup> C. J. Villar,<sup>1</sup> F. Lombó<sup>1\*</sup>**

8  
9   <sup>1</sup>Research Group BIONUC (Biotechnology of Nutraceuticals and Bioactive Compounds), Department  
10 of Functional Biology, Area of Microbiology, Universidad de Oviedo, Oviedo, Principality of Asturias,  
11 Spain. IUOPA (Instituto Universitario de Oncología del Principado de Asturias), ISPA (Instituto de  
12 Investigación Sanitaria del Principado de Asturias), Principality of Asturias, Spain.

13 <sup>2</sup>Department of Animal Science, Faculty of Veterinary Medicine, Universidad Complutense de Madrid,  
14 Spain.

15 <sup>3</sup>Research and Development Department, Cárnicas Joselito S.A., Salamanca, Spain.

16 <sup>4</sup>Molecular Histopathology Unit in Animal Models for Cancer, Instituto Universitario de Oncología del  
17 Principado de Asturias (IUOPA), Universidad de Oviedo.

18  
19 \*Correspondence: F. Lombó, PhD, Biotechnology in Nutraceuticals and Bioactive Compounds  
20 (BIONUC) Research Unit, Universidad de Oviedo, Oviedo, 33006, Spain. Tel: +34-985103593, e-mail:  
21 lombofelipe@uniovi.es

22  
23  
24  
25  
26

27 **Figure S1. Effect of acorn ham on colon and small intestine parameters.** Circles and squares  
 28 indicate the corresponding value or score for each rat. **A**, percentage of colon length reduction, in  
 29 comparison with the mean value for absolute control animals in each cohort. This reduction mean  
 30 value for acorn-feed ham cohort was lower (14.67%) than in the case of the mean value for feed  
 31 cohort (20.62%), but this difference was not statistically significant. **B**, presence of reparative changes  
 32 in colon mucosa: 0, no reparative changes; 1, mild reparative changes (less than 50% of ulcerations  
 33 surface is re-epithelized); 2, moderate reparative changes (more than 50% of ulcerations are re-  
 34 epithelized); 3, severe reparative changes (total ulcerations re-epithelization). Although in acorn-feed  
 35 ham cohort the re-epithelization mean score (1.75) was higher than in feed cohort (1.12), this  
 36 difference was not statistically significant. **C**, percentage of increase in the number of hyperplastic  
 37 Peyer's patches in small intestine, in comparison with the mean value for absolute control animals in  
 38 each cohort. Although in acorn-feed ham cohort (23.53% increase) the mean value of hyperplastic  
 39 Peyer's patches was lower than in feed cohort (45.31% increase), this difference was not statistically  
 40 significant. **D**, Evans blue assay showed no statistical significant differences among acorn-feed ham  
 41 cohort (0.06  $\mu\text{g}/\text{mL}$ ) and feed cohort (0.10  $\mu\text{g}/\text{mL}$ ). This assay indicates alterations in colon  
 42 permeability, which is higher in UC condition.

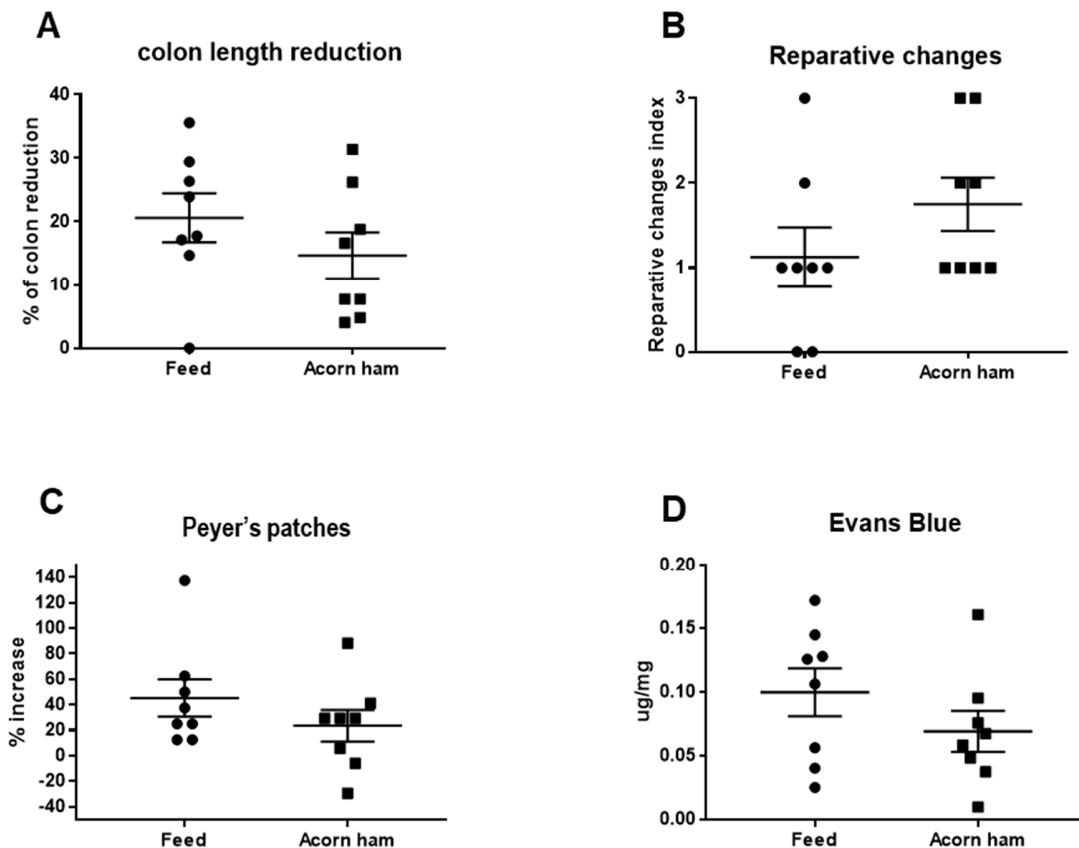

[Escriba aquí]

58 **Figure S2. Intestinal microbiota composition (Families).** Absolute control animals from each  
 59 cohort (animals 9 and 10) showed strong differences between vegetable feed cohort and both meat  
 60 products cohorts, at the level of *Firmicutes*, *Bacteroidetes* and *Proteobacteria* phyla. F: feed, C: control  
 61 ham; A: acorn-fed ham.

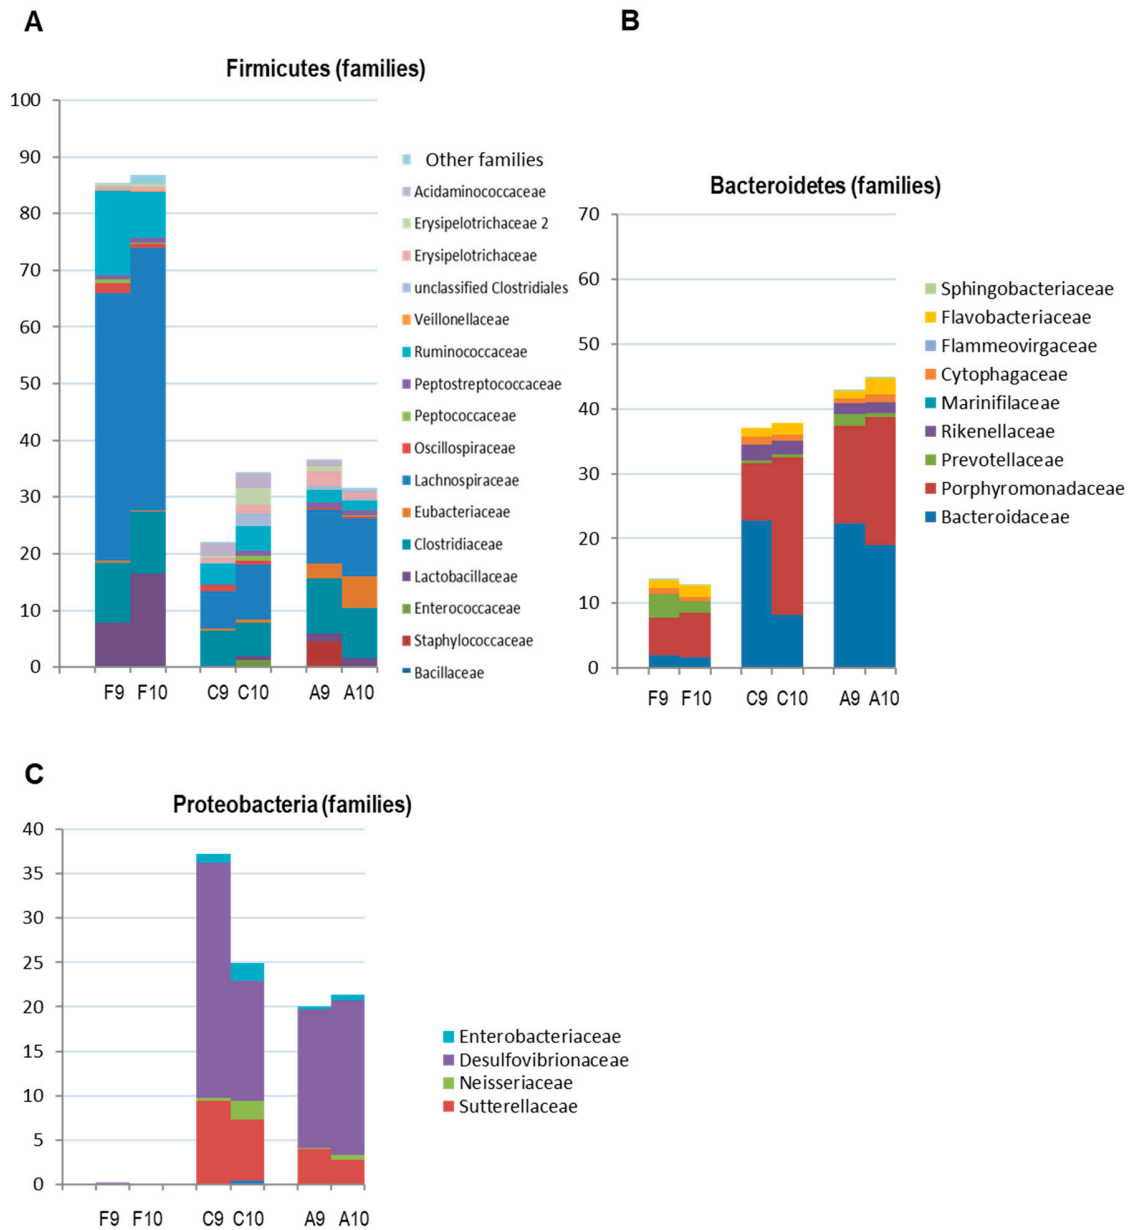

62

[Escriba aquí]

63 **Figure S3. Taxonomic groups associated to nitrate reductase enzymatic activity in intestinal**  
64 **microbiota.** The relative percentage of the phylum Actinobacteria and the classes Betaproteobacteria  
65 and Gammaproteobacteria, which usually show nitrate reductase gene functions, is shown for  
66 absolute control animals from both types of ham cohorts. CH: control ham; AH: acorn-feed ham.  
67

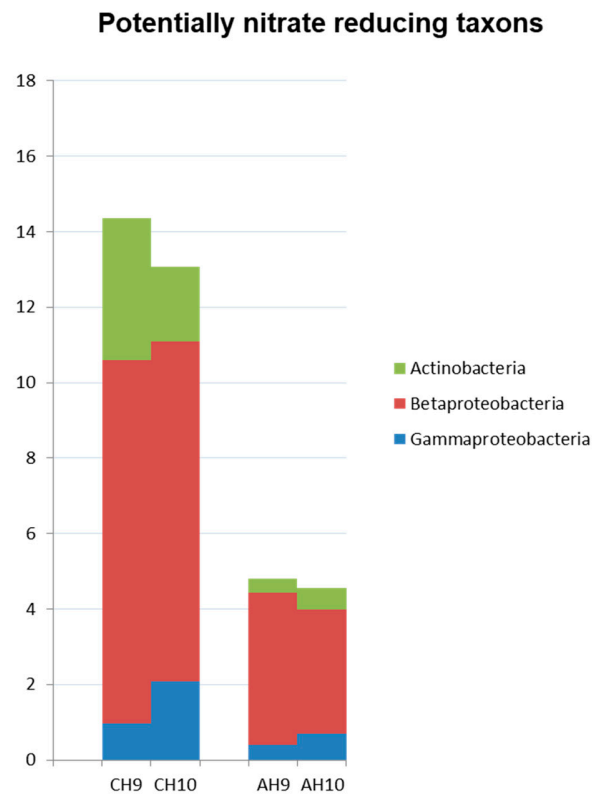

[Escriba aquí]
